# Supplementary material for: Calorie Restriction Using High-Fat/Low-Carbohydrate Diet Suppresses Liver Fat Accumulation and Pancreatic Beta-Cell Dedifferentiation in Obese Diabetic Mice
Source: MDPI journal article supplement (doi:10.3390/nu16070995), 2024-03-28
Supplement: s1 [file s1]

Figure S1: Oil Red O staining in the liver.

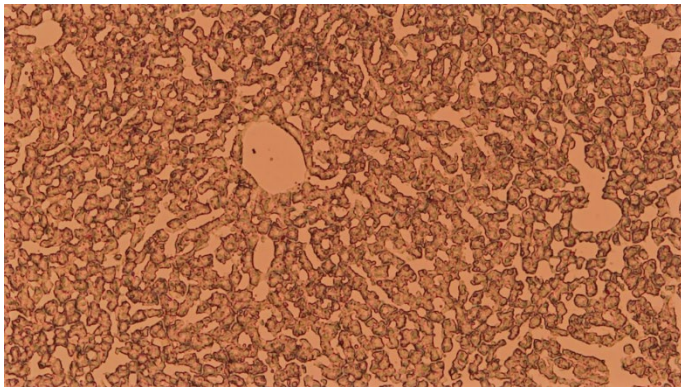

db-HF

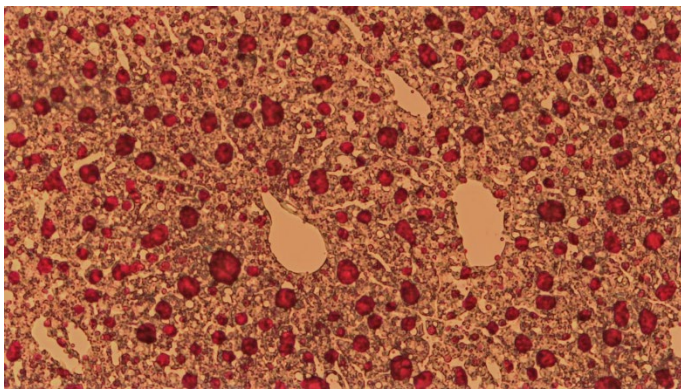

db-HC

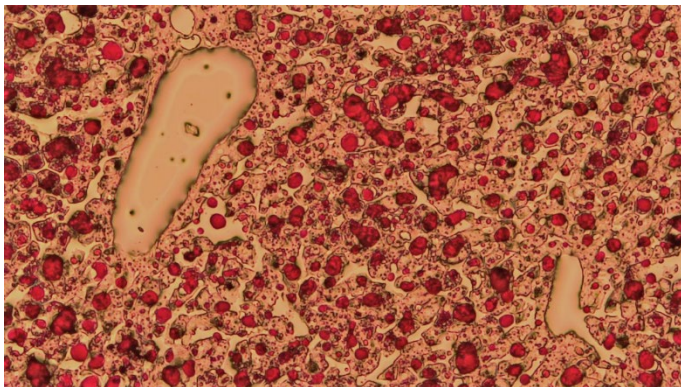

db-AD

Oil Red O powder (Sigma, #O0625-25G) was dissolved in isopropanol at 60 °C for 30 min, and diluted with distilled water (ORO solution:dH<sub>2</sub>O 3:2) to make a working solution. After the frozen sections were returned to room temperature, the sections were washed with 60% isopropanol two times, and stained by Oil Red O working solution for 15 minutes. After washed with 60% isopropanol three times, the sections were washed with tap water for one minute. [69]

The sections were observed at 40x magnification with a LBD and ND filters, and photographed under an optical microscope (OLYMPUS BX50 [Evident, Tokyo, Japan]).

Figure S2: Pathway map for PPAR signaling pathway (KEGG # mmu03320) showing DEGs in the db-HF group.

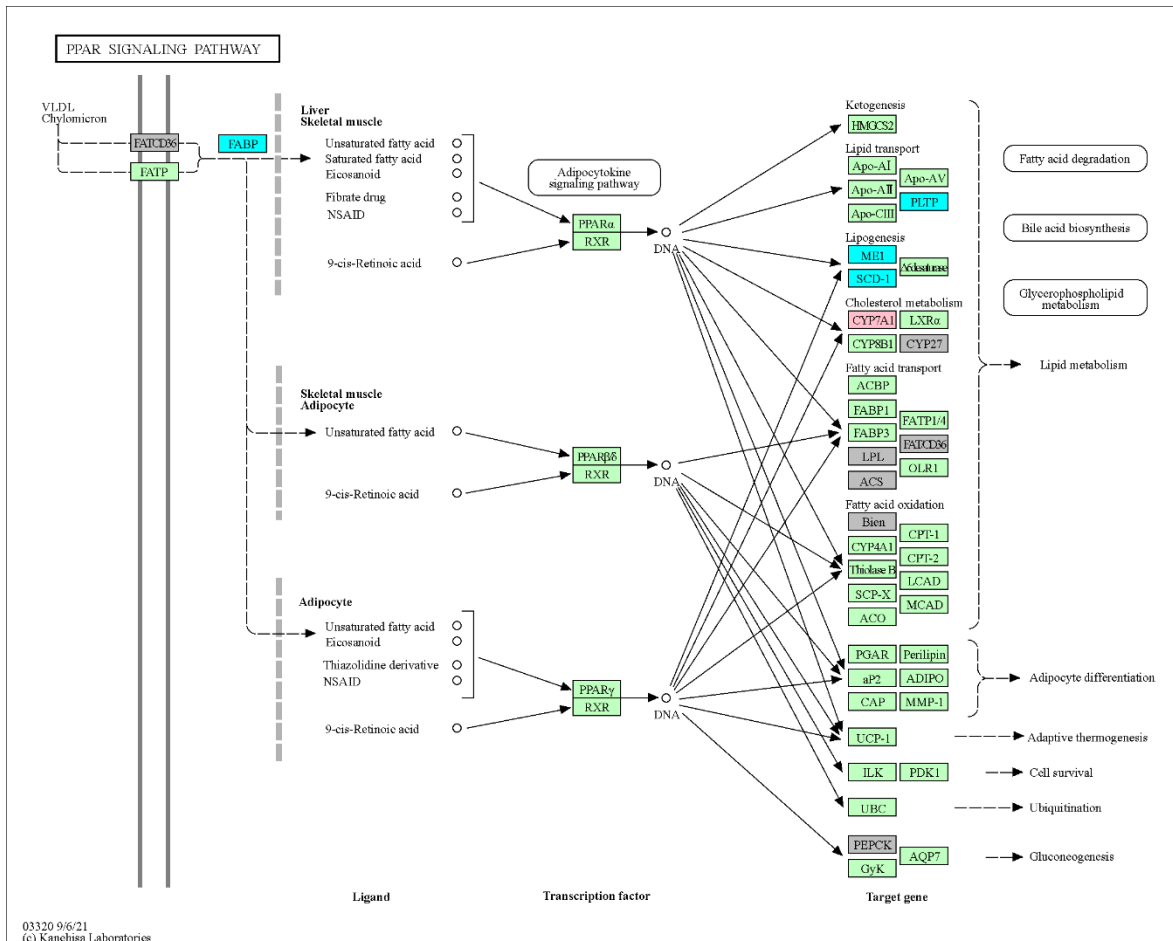

Genes highly expressed in the db-HF group compared to the db-HC group are highlighted in pink, while lower-expressed genes are marked in blue.

Figure S3: Serum ketone body and NEFA in the db-HF, db-HC and db-AD groups.

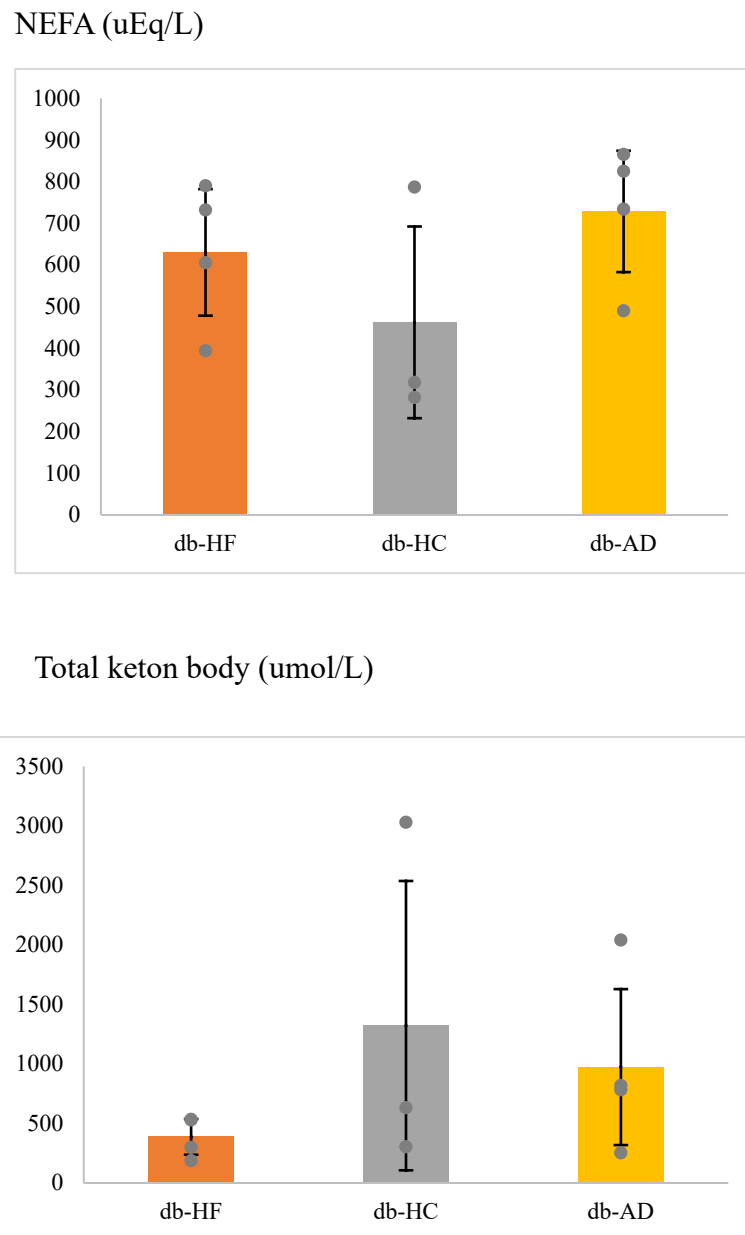

Data is shown as means  $\pm$  S.D; n=3-4 for each group.

Figure S4: Original z-score data for heatmap in Figure 6.

S4a. List of more enriched DEGs in the db-HC compared to the db-HF group.

| db-HF1 | db-HF2 | db-HC1 | db-HC2 | db-AD1 | db-AD2 | GeneName |
|--------|--------|--------|--------|--------|--------|----------|
| -1.39  | -1.19  | 0.64   | 1.05   | -0.17  | 1.05   | Gm2a     |
| -0.62  | -1.79  | -0.14  | 0.86   | 0.50   | 1.19   | Ugp2     |
| -0.67  | -1.33  | 0.33   | 1.67   | 0.67   | -0.67  | Arpp19   |
| -1.23  | -0.80  | 0.36   | 1.09   | 1.38   | -0.80  | Entpd5   |
| -1.50  | -1.25  | 0.75   | 0.75   | 0.25   | 1.00   | Hexa     |
| -0.72  | -0.33  | 0.46   | 2.03   | -0.72  | -0.72  | Pgd      |
| -0.85  | -1.01  | 1.01   | 1.69   | -0.34  | -0.51  | Ugdh     |
| -0.95  | 0.14   | 0.81   | 1.71   | -0.99  | -0.72  | Acacb    |
| -1.94  | -0.59  | 0.23   | 0.68   | 0.68   | 0.95   | Mlec     |
| 0.12   | -1.28  | 0.46   | 1.86   | -0.58  | -0.58  | Pgm3     |
| 0.23   | -0.47  | 1.66   | 0.71   | -0.78  | -1.36  | Ugt1a5   |
| -1.38  | -1.13  | 0.69   | 1.13   | 1.00   | -0.31  | Ugt1a9   |
| -0.19  | -0.16  | 0.81   | 1.71   | -1.09  | -1.09  | Cyp51    |
| -1.09  | 0.35   | 0.90   | 1.55   | -1.00  | -0.70  | Fads1    |
| -0.67  | -0.49  | 1.55   | 1.25   | -0.78  | -0.86  | Cyb5r3   |
| 0.55   | -0.68  | 1.01   | 1.33   | -1.07  | -1.14  | Acaca    |
| -0.54  | 0.34   | 0.60   | 1.72   | -1.20  | -0.92  | Acly     |
| -0.16  | -0.22  | 0.66   | 1.81   | -0.88  | -1.21  | Fdft1    |
| -1.67  | 0.10   | 0.93   | 1.42   | -0.32  | -0.46  | Fads2    |
| 0.06   | -0.01  | 0.27   | 1.87   | -1.01  | -1.18  | Gpam     |
| -1.17  | 0.05   | 0.85   | 1.70   | -0.62  | -0.80  | Acsl5    |
| -0.03  | 0.16   | 0.89   | 1.46   | -1.27  | -1.21  | Fasn     |
| -1.39  | -1.09  | 1.00   | 1.19   | 0.60   | -0.30  | Hsd17b12 |
| -0.19  | -0.14  | 0.84   | 1.68   | -1.17  | -1.03  | Acss2    |
| -1.02  | -0.58  | 1.44   | 0.68   | 0.73   | -1.24  | Hsd17b11 |
| 0.12   | -1.36  | 0.86   | 1.60   | -0.80  | -0.43  | Acsl4    |
| -0.07  | -0.36  | 0.64   | 1.83   | -0.98  | -1.07  | Msmo1    |
| -0.73  | -0.23  | 1.67   | 0.90   | -0.31  | -1.31  | Elov15   |
| 0.27   | -0.14  | 0.48   | 1.72   | -1.17  | -1.17  | Acsl3    |
| -0.86  | -0.83  | 0.75   | 1.84   | -0.14  | -0.77  | Hsd17b13 |
| -0.77  | -0.58  | 1.22   | 1.57   | -0.53  | -0.91  | Scd1     |

|       |       |       |       |       |       |         |
|-------|-------|-------|-------|-------|-------|---------|
| -0.27 | -0.50 | 1.60  | 1.11  | -0.93 | -1.01 | Elovl6  |
| -0.95 | 0.14  | 0.81  | 1.71  | -0.99 | -0.72 | Acacb   |
| 0.31  | -0.28 | 0.64  | 1.65  | -1.12 | -1.20 | Idi1    |
| -0.24 | -0.11 | 0.80  | 1.71  | -1.15 | -1.02 | Dher7   |
| -1.36 | 0.20  | 1.20  | 1.29  | -0.44 | -0.90 | Rdh16   |
| -0.29 | -0.46 | 0.57  | 1.95  | -0.83 | -0.95 | Hmgcs1  |
| -2.01 | -0.22 | 0.74  | 0.72  | 0.91  | -0.14 | Hsd17b4 |
| -1.23 | -0.44 | 1.05  | -0.12 | -0.84 | 1.57  | Cyp2c40 |
| -0.88 | -0.79 | 1.46  | 1.32  | -0.79 | -0.31 | Cyp2a4  |
| -0.92 | -0.81 | 1.67  | 0.43  | 0.66  | -1.03 | Cyp2a22 |
| -1.39 | -1.19 | 0.64  | 1.05  | -0.17 | 1.05  | Gm2a    |
| -0.93 | 0.53  | 1.42  | 0.78  | -0.34 | -1.45 | Acaa1b  |
| -1.33 | -0.74 | 1.04  | 1.31  | 0.52  | -0.80 | Acot2   |
| -0.98 | -0.31 | 1.43  | 1.28  | -0.34 | -1.08 | Ehhadh  |
| -0.55 | -0.02 | 0.90  | 1.69  | -1.07 | -0.94 | Acat2   |
| -1.20 | -0.88 | 1.04  | 0.72  | 1.20  | -0.88 | Lipa    |
| -1.50 | -1.25 | 0.75  | 0.75  | 0.25  | 1.00  | Hexa    |
| -0.75 | -1.17 | 1.39  | 0.53  | 0.96  | -0.96 | Nceh1   |
| -0.62 | -0.49 | 0.77  | 1.89  | -0.84 | -0.71 | Gstm3   |
| -1.18 | -0.32 | 0.37  | 1.92  | 0.03  | -0.83 | Gstm4   |
| -1.43 | -0.47 | 0.69  | 1.69  | -0.62 | 0.13  | Gstm2   |
| -0.77 | -0.38 | 0.99  | 1.74  | -0.86 | -0.72 | Gstm1   |
| -1.03 | -1.12 | -0.15 | 1.51  | -0.34 | 1.12  | Gstp1   |
| -0.56 | 0.17  | 1.05  | 1.49  | -1.15 | -1.00 | Gstm6   |
| -1.78 | -0.56 | -0.19 | 1.30  | 0.51  | 0.72  | Gpx4    |
| -0.87 | -1.45 | 0.10  | 1.64  | -0.10 | 0.67  | Chmp2b  |
| -0.97 | -0.97 | 0.49  | 1.94  | -0.24 | -0.24 | Myo5b   |
| -0.67 | -1.33 | 0.33  | 1.67  | 0.67  | -0.67 | Arpp19  |
| -1.13 | -1.56 | 0.14  | 0.99  | 0.99  | 0.57  | Ccng1   |
| -1.29 | -0.75 | 0.31  | 1.91  | 0.04  | -0.22 | Rtn4    |
| -1.17 | 0.05  | 0.85  | 1.70  | -0.62 | -0.80 | Acsl5   |
| -0.98 | -0.98 | 0.20  | 1.96  | -0.39 | 0.20  | P2rx4   |
| -0.59 | -1.06 | -0.12 | 2.01  | -0.59 | 0.35  | Ctss    |
| -1.59 | -1.04 | 0.46  | 0.31  | 1.36  | 0.51  | Cd36    |
| 0.27  | -0.14 | 0.48  | 1.72  | -1.17 | -1.17 | Acsl3   |

|       |       |       |      |       |       |         |
|-------|-------|-------|------|-------|-------|---------|
| -0.54 | -0.36 | 1.25  | 1.50 | -0.75 | -1.10 | Pltp    |
| -0.88 | -1.33 | 0.72  | 0.27 | 1.64  | -0.42 | Slc16a7 |
| -1.53 | -0.25 | 0.37  | 1.53 | 0.68  | -0.80 | Pctp    |
| -1.67 | -0.65 | 0.09  | 1.55 | 0.60  | 0.09  | Abcc3   |
| -0.48 | -0.90 | 0.35  | 2.01 | -0.07 | -0.90 | Slc20a1 |
| -1.61 | -0.23 | 0.32  | 1.70 | 0.32  | -0.51 | Atp9a   |
| -1.45 | -0.33 | 0.61  | 1.52 | 0.55  | -0.90 | Plin2   |
| -0.44 | -0.42 | 0.65  | 1.93 | -0.74 | -0.97 | Aqp8    |
| 0.12  | -1.36 | 0.86  | 1.60 | -0.80 | -0.43 | Acsl4   |
| -1.57 | -1.00 | -0.14 | 1.00 | 0.71  | 1.00  | Slc16a1 |
| -0.59 | -1.06 | -0.12 | 2.01 | -0.59 | 0.35  | Ctss    |
| -0.94 | -0.31 | -0.24 | 1.96 | -0.94 | 0.47  | H2-K1   |
| -1.22 | -1.30 | 0.33  | 0.26 | 1.59  | 0.33  | Hprt    |
| -0.70 | -1.30 | 0.90  | 0.70 | 1.30  | -0.90 | Raet1d  |
| -1.36 | -1.24 | 0.27  | 0.51 | 1.48  | 0.33  | Cd81    |
| 0.27  | -1.13 | 0.27  | 1.92 | -0.67 | -0.67 | Ccl9    |
| -1.29 | -0.75 | 0.31  | 1.91 | 0.04  | -0.22 | Rtn4    |
| -0.20 | -0.43 | 0.35  | 2.03 | -0.76 | -0.98 | Cxadr   |
| -0.11 | -0.34 | 0.80  | 1.72 | -1.26 | -0.80 | Vegfb   |
| -0.98 | -0.98 | 0.20  | 1.96 | -0.39 | 0.20  | P2rx4   |
| -0.27 | -1.07 | 1.34  | 1.34 | -1.07 | -0.27 | Arhgef5 |
| -1.70 | -0.50 | 0.55  | 1.60 | -0.05 | 0.10  | Gas6    |
| -0.80 | -0.80 | 0.57  | 1.94 | -0.80 | -0.11 | Ticam1  |
| -1.59 | -1.04 | 0.46  | 0.31 | 1.36  | 0.51  | Cd36    |
| -1.13 | -1.46 | 0.73  | 0.07 | 1.38  | 0.40  | Dnajb9  |
| -0.43 | -1.30 | 0.87  | 1.73 | -0.43 | -0.43 | Parp3   |
| -1.55 | -0.48 | 0.80  | 0.16 | 1.57  | -0.48 | Vnn1    |
| -1.24 | -1.02 | 0.56  | 0.34 | -0.34 | 1.69  | Bst2    |
| -0.70 | -1.30 | 0.90  | 0.70 | 1.30  | -0.90 | Raet1d  |

S3b. List of more enriched DEGs in the db-HF compared to the db-HC group.

| db-HF1 | db-HF2 | db-HC1 | db-HC2 | db-AD1 | db-AD2 | GeneName  |
|--------|--------|--------|--------|--------|--------|-----------|
| -0.62  | -0.22  | -0.89  | -0.83  | 0.65   | 1.91   | C9        |
| -0.10  | 1.96   | -1.21  | -0.68  | -0.31  | 0.34   | C3        |
| 0.88   | 1.11   | -1.41  | -1.23  | -0.04  | 0.70   | Hc        |
| 1.53   | -0.29  | -1.09  | -1.25  | 0.20   | 0.89   | C8b       |
| 0.21   | -0.28  | -0.85  | -1.49  | 1.03   | 1.37   | C8a       |
| -0.21  | 0.06   | -0.91  | -1.35  | 0.76   | 1.65   | Egfr      |
| 0.85   | 0.99   | -1.35  | -1.14  | 1.02   | -0.38  | Fgg       |
| 0.47   | 1.67   | -1.27  | -1.13  | 0.34   | -0.08  | Fga       |
| 2.03   | 0.08   | -0.65  | -1.14  | -0.41  | 0.08   | Arhgap42  |
| -0.02  | 2.06   | -0.85  | -0.95  | -0.33  | 0.09   | Cbs       |
| 0.90   | 0.78   | -1.36  | -0.93  | -0.61  | 1.22   | Cps1      |
| 1.42   | 1.33   | -0.95  | -0.99  | -0.39  | -0.43  | Serpinf2  |
| 0.56   | 1.68   | -1.05  | -1.33  | 0.00   | 0.14   | Ece1      |
| 0.99   | -0.58  | -0.97  | -1.36  | 0.79   | 1.13   | Cyp7a1    |
| 1.39   | 1.39   | -0.28  | -0.83  | -0.83  | -0.83  | Itpr2     |
| 1.72   | 0.97   | -0.67  | -0.82  | -0.97  | -0.22  | F7        |
| 1.20   | 0.24   | -1.60  | -1.07  | 0.56   | 0.67   | Cdo1      |
| -0.06  | 1.43   | -1.00  | -0.62  | -1.00  | 1.25   | Klf9      |
| 0.56   | 1.93   | -1.16  | -0.59  | -0.35  | -0.39  | Itih3     |
| 0.50   | 1.71   | -1.23  | -1.08  | -0.21  | 0.31   | Vtn       |
| 1.85   | 0.12   | -1.19  | -1.05  | 0.25   | 0.02   | Serpina3n |
| 1.14   | 1.46   | -1.14  | -1.10  | -0.27  | -0.09  | Itih4     |
| 1.29   | 1.04   | -1.17  | -1.23  | -0.40  | 0.47   | Ahsg      |
| 1.52   | 1.02   | -1.00  | -1.26  | -0.06  | -0.23  | Fetub     |
| 0.97   | 0.94   | -0.25  | -1.94  | -0.27  | 0.55   | Rgn       |
| -0.21  | 1.81   | -0.53  | -1.21  | -0.62  | 0.75   | Herpud1   |
| 1.42   | 1.33   | -0.95  | -0.99  | -0.39  | -0.43  | Serpinf2  |
| 0.67   | -0.45  | -1.14  | -1.28  | 1.22   | 0.97   | Serpina3k |
| 1.65   | -0.12  | -1.11  | -1.28  | 0.34   | 0.53   | Mug1      |
| 1.42   | 1.19   | 0.05   | -1.13  | -1.01  | -0.53  | Serpina6  |
| 1.22   | 1.43   | -1.08  | -1.08  | -0.24  | -0.24  | Serpina11 |
| 0.45   | 0.60   | -1.07  | -1.69  | 0.92   | 0.79   | Serpina1a |
| 1.14   | 1.34   | -0.57  | -1.54  | -0.46  | 0.09   | Serpina1d |
| 0.97   | 0.10   | -1.17  | -1.34  | 0.07   | 1.38   | Serpina1c |

|       |       |       |       |       |       |           |
|-------|-------|-------|-------|-------|-------|-----------|
| 0.81  | -0.17 | -1.75 | -0.72 | 0.72  | 1.10  | Serpina3m |
| 1.31  | 1.09  | -0.44 | -1.42 | -0.87 | 0.33  | Hsd11b1   |
| 1.19  | 0.18  | -0.70 | 0.00  | -1.72 | 1.06  | Lpin1     |
| 1.18  | 0.97  | -1.52 | -1.11 | 0.14  | 0.35  | Acox2     |
| 2.19  | -0.44 | -0.03 | -0.64 | -0.64 | -0.44 | Hacl1     |
| 1.41  | 0.88  | -1.24 | -1.24 | -0.18 | 0.35  | Cyp26a1   |
| 0.90  | 0.78  | -1.36 | -0.93 | -0.61 | 1.22  | Cps1      |
| 0.90  | 1.50  | -0.87 | -0.95 | -1.04 | 0.47  | Cyp27a1   |
| -0.21 | 1.56  | -1.19 | -0.77 | -0.50 | 1.11  | Pck1      |
| 0.99  | -0.58 | -0.97 | -1.36 | 0.79  | 1.13  | Cyp7a1    |
| 2.14  | -0.09 | -0.65 | -0.93 | -0.09 | -0.37 | Etfbkmt   |
| 1.61  | 1.10  | -0.42 | -1.19 | -0.55 | -0.55 | Ces1b     |
| 1.07  | 1.52  | -0.42 | -1.26 | -0.87 | -0.04 | Ces1c     |
| 1.41  | -0.12 | -0.93 | -1.52 | 0.84  | 0.32  | Ces3a     |
| 1.98  | 0.08  | 0.35  | -0.74 | -0.88 | -0.79 | Ces3b     |
| 0.48  | 0.34  | -0.89 | -1.72 | 0.52  | 1.28  | Akr1c6    |
| 1.39  | 0.89  | -0.60 | -1.53 | -0.60 | 0.46  | Cyp4f14   |
| 1.42  | 0.62  | -0.52 | -1.53 | -0.69 | 0.70  | Cyp2c23   |
| 0.41  | -0.04 | -1.07 | -1.42 | 1.53  | 0.59  | Cyp2e1    |
| 0.46  | 0.87  | -1.29 | -1.25 | -0.14 | 1.35  | Cyp2c37   |
| 1.23  | -0.38 | -1.07 | -1.20 | 0.10  | 1.32  | Cyp2c54   |
| 0.22  | -0.01 | -0.98 | -1.30 | 0.26  | 1.80  | Cyp2c50   |
| 1.99  | 0.34  | -0.08 | -0.58 | -1.15 | -0.52 | Cyp2c70   |
| -0.17 | -0.55 | -1.19 | -0.79 | 1.29  | 1.40  | Cyp2d9    |
| 0.75  | 1.50  | -0.43 | -0.75 | -1.50 | 0.43  | Prodh     |
| -0.26 | 1.32  | -1.10 | -1.25 | 0.12  | 1.17  | Sardh     |
| 0.99  | 1.58  | 0.04  | -0.67 | -0.67 | -1.27 | Amdhd1    |
| 0.91  | 1.77  | -0.58 | -0.58 | -1.08 | -0.44 | Hal       |
| 0.34  | 0.51  | -0.76 | -1.54 | -0.17 | 1.62  | Pah       |
| -0.02 | 2.06  | -0.85 | -0.95 | -0.33 | 0.09  | Cbs       |
| -0.04 | 0.88  | -0.97 | -1.26 | -0.23 | 1.62  | Got1      |
| 0.24  | 1.33  | -1.69 | -0.72 | -0.06 | 0.90  | Asl       |
| 0.90  | 0.78  | -1.36 | -0.93 | -0.61 | 1.22  | Cps1      |
| 0.97  | 1.74  | -0.68 | -0.90 | -0.79 | -0.35 | Agxt      |
| -0.34 | 1.41  | -1.09 | -1.00 | -0.27 | 1.28  | Ahcy      |
| 0.18  | 0.44  | -1.41 | -1.25 | 0.73  | 1.30  | Tdo2      |
| -0.27 | 1.66  | -1.04 | -0.82 | -0.57 | 1.05  | Cth       |



|       |       |       |       |       |       |         |
|-------|-------|-------|-------|-------|-------|---------|
| -0.28 | 1.14  | -0.96 | -1.41 | 0.23  | 1.28  | Hpd     |
| 1.08  | 1.36  | -0.40 | 0.20  | -1.48 | -0.76 | Sds     |
| 0.42  | 0.77  | -0.87 | -0.97 | -0.97 | 1.61  | Aass    |
| 1.20  | 0.24  | -1.60 | -1.07 | 0.56  | 0.67  | Cdol    |
| 0.96  | 1.65  | -0.01 | -1.07 | -0.84 | -0.70 | Prodh2  |
| -0.16 | 0.99  | -1.50 | -1.00 | 0.42  | 1.25  | Mat1a   |
| 0.19  | 2.03  | -0.54 | -0.21 | -1.20 | -0.27 | Gls2    |
| 1.03  | 1.67  | -0.32 | -0.80 | -1.07 | -0.50 | Gm5424  |
| 0.26  | 0.62  | -1.62 | -1.03 | 0.49  | 1.28  | Sephs2  |
| -0.33 | -0.69 | -0.90 | -0.86 | 1.46  | 1.31  | Bhmt    |
| 0.08  | 2.08  | -0.25 | -0.64 | -1.07 | -0.19 | Ass1    |
| 1.79  | -0.27 | -1.15 | -0.86 | 0.76  | -0.27 | Prox1   |
| 0.50  | 1.71  | -1.23 | -1.08 | -0.21 | 0.31  | Vtn     |
| 1.90  | -0.32 | -0.76 | -0.91 | 0.71  | -0.62 | Hhex    |
| 0.24  | 1.33  | -1.69 | -0.72 | -0.06 | 0.90  | Asl     |
| -0.21 | 1.56  | -1.19 | -0.77 | -0.50 | 1.11  | Pek1    |
| 1.12  | 1.20  | -1.07 | -1.31 | 0.50  | -0.44 | Fgl1    |
| 1.20  | 1.28  | -1.33 | -1.07 | 0.00  | -0.09 | Hp      |
| 1.18  | 0.97  | -1.52 | -1.11 | 0.14  | 0.35  | Acox2   |
| 1.40  | 0.45  | -1.03 | -1.55 | 0.62  | 0.10  | Cyp3a13 |
| 1.66  | 0.53  | -0.69 | -1.44 | 0.44  | -0.50 | Cyp3a59 |
| 1.83  | 0.71  | -0.40 | -0.16 | -0.95 | -1.03 | Sema4g  |
| -0.27 | 0.81  | -0.99 | -1.36 | 0.27  | 1.54  | Inhbc   |
| 0.06  | 0.73  | -1.13 | -0.96 | -0.45 | 1.75  | Il6ra   |
| 0.70  | 1.18  | -0.58 | -1.32 | -1.00 | 1.02  | Saa4    |
| 0.74  | 0.74  | -1.40 | -1.40 | 0.89  | 0.43  | Cxcl12  |
| 0.19  | 1.75  | -0.58 | -1.36 | 0.58  | -0.58 | Osgin1  |
| 2.22  | -0.15 | -0.50 | -0.48 | -0.52 | -0.56 | Saa1    |
| 1.70  | 0.52  | -1.24 | -1.05 | 0.33  | -0.26 | Nr1i3   |
| 0.76  | 1.41  | -1.21 | -1.04 | -0.61 | 0.70  | Sdc4    |
| -0.21 | 0.06  | -0.91 | -1.35 | 0.76  | 1.65  | Egfr    |
| 1.89  | 0.00  | -0.38 | -1.51 | 0.00  | 0.00  | Il1rap  |
| -0.64 | 1.04  | -0.88 | -1.00 | -0.16 | 1.64  | Gfra1   |
| 0.82  | 1.22  | -0.41 | -1.22 | -1.22 | 0.82  | Il1r1   |
| 0.82  | 1.52  | -1.25 | -1.09 | -0.37 | 0.36  | Pigr    |
| 0.06  | 0.73  | -1.13 | -0.96 | -0.45 | 1.75  | Il6ra   |
| 1.87  | 0.31  | 0.41  | -0.86 | -0.77 | -0.95 | Clec2d  |

|      |       |       |       |       |       |           |
|------|-------|-------|-------|-------|-------|-----------|
| 2.10 | 0.17  | -0.23 | -0.87 | -0.39 | -0.79 | Nlrp6     |
| 0.56 | 1.93  | -1.16 | -0.59 | -0.35 | -0.39 | Itih3     |
| 0.50 | 1.71  | -1.23 | -1.08 | -0.21 | 0.31  | Vtn       |
| 1.14 | 1.46  | -1.14 | -1.10 | -0.27 | -0.09 | Itih4     |
| 1.29 | 1.04  | -1.17 | -1.23 | -0.40 | 0.47  | ahsg      |
| 0.20 | 1.29  | -1.37 | -1.14 | -0.04 | 1.06  | cpn2      |
| 0.47 | 1.67  | -1.27 | -1.13 | 0.34  | -0.08 | fga       |
| 0.85 | 0.99  | -1.35 | -1.14 | 1.02  | -0.38 | fgg       |
| 1.42 | 1.33  | -0.95 | -0.99 | -0.39 | -0.43 | Serpinf2  |
| 2.22 | -0.25 | -0.41 | -0.58 | -0.58 | -0.41 | Col27a1   |
| 0.67 | -0.45 | -1.14 | -1.28 | 1.22  | 0.97  | Serpina3k |
| 0.97 | 1.67  | -0.43 | -0.58 | -1.28 | -0.35 | Ang       |

Table S1: Composition of NM, HF, and HC diets.

| Product #                             | Normal Diet    |             | High Fat Diet |             | High Carbo Diet |             |
|---------------------------------------|----------------|-------------|---------------|-------------|-----------------|-------------|
| %                                     | gm             | kcal        | gm            | kcal        | gm              | kcal        |
| Protein                               | 24             | <b>24</b>   | 28            | <b>24</b>   | 22              | <b>24.1</b> |
| Carbohydrate                          | 59             | <b>59</b>   | 38            | <b>33</b>   | 68              | <b>73.4</b> |
| Fat                                   | 8              | <b>17</b>   | 22            | <b>43</b>   | 1               | <b>2.5</b>  |
| Total                                 |                | 100         |               | 100         |                 | 100         |
| kcal/gm                               | 4.0            |             | 4.7           |             | 3.7             |             |
|                                       |                |             |               |             |                 |             |
| Ingredient                            | gm             | kcal        | gm            | kcal        | gm              | kcal        |
| Casein                                | 240            | 960         | 240           | 960         | 240             | 960         |
| L-Cystine                             | 4              | 16          | 4             | 16          | 4               | 16          |
|                                       |                |             |               |             |                 |             |
| Corn Starch                           | 387.5          | 1550        | 121           | 484         | 484             | 1936        |
| Maltodextrin 10                       | 100            | 400         | 100           | 400         | 150             | 600         |
| Sucrose                               | 100            | 400         | 100           | 400         | 100             | 400         |
|                                       |                |             |               |             |                 |             |
| Cellulose, BW200                      | 50             | 0           | 50            | 0           | 50              | 0           |
|                                       |                |             |               |             |                 |             |
| Soybean Oil                           | 76.5           | 689         | 65            | 585         | 11.4            | 103         |
| Lard                                  | 0              | 0           | 130           | 1170        | 0               | 0           |
|                                       |                |             |               |             |                 |             |
| Mineral Mix S10026                    | 10             | 0           | 10            | 0           | 10              | 0           |
| DiCalcium Phosphate                   | 13             | 0           | 13            | 0           | 13              | 0           |
| Calcium Carbonate                     | 5.5            | 0           | 5.5           | 0           | 5.5             | 0           |
| Potassium Citrate, 1 H <sub>2</sub> O | 16.5           | 0           | 16.5          | 0           | 16.5            | 0           |
|                                       |                |             |               |             |                 |             |
| Vitamin Mix V10001                    | 10             | 40          | 10            | 40          | 10              | 40          |
| Choline Bitartrate                    | 2              | 0           | 2             | 0           | 2               | 0           |
|                                       |                |             |               |             |                 |             |
| FD&C Yellow Dye #5                    | 0              | 0           | 0             | 0           | 0.05            | 0           |
| FD&C Red Dye #40                      | 0              | 0           | 0.05          | 0           | 0               | 0           |
| FD&C Blue Dye #1                      | 0.05           | 0           | 0             | 0           | 0               | 0           |
|                                       |                |             |               |             |                 |             |
| <b>Total</b>                          | <b>1015.05</b> | <b>4055</b> | <b>867.05</b> | <b>4055</b> | <b>1096.45</b>  | <b>4055</b> |

Table S2: List of primer sequences used in SYBR & TaqMan-qPCR.

| Gene Function                    | Gene Name        | Gene Description                                                        | Base Sequence                                                        |
|----------------------------------|------------------|-------------------------------------------------------------------------|----------------------------------------------------------------------|
| Relation of Fat Oxidation        | Pgc1a            | peroxisome proliferative activated receptor, gamma, coactivator 1 alpha | F: TATGGAGTGACATAGAGTGTGCT<br>R: GTCGCTACACCACTTCAATCC               |
|                                  | Ppara            | peroxisome proliferator activated receptor alpha                        | F: AACATCGATTGTGAATATGTGG<br>R: CCGAATAGTTCGCCGAAAGAA                |
|                                  | Lcad (Acadl)     | acyl-Coenzyme A dehydrogenase, long-chain                               | F: TCTTTTCCTCGGAGCATGACA<br>R: GACCTCTCTACTCACTTCTCCAG               |
|                                  | Cpt1a            | carnitine palmitoyltransferase 1a                                       | F: CTATGCGCTACTCGCTGAAGG<br>R: GGCTTTCGACCCGAGAAGA                   |
|                                  |                  |                                                                         |                                                                      |
| Relation of Fat Synthesis        | Scd1             | stearoyl-Coenzyme A desaturase 1                                        | F: TTCTTGCGATACACTCTGGTGC<br>R: CGGGATTGAATGTTCTTGTCGT               |
|                                  | Srebp1c (Srebf1) | sterol regulatory element binding transcription factor 1                | F: ATCGGCGCGGAAGCTGTCGGGGTAGCGTC<br>R: ACTGTCTTGTTGTTGATGAGCTGGAGCAT |
|                                  | Cebpa            | CCAAT/enhancer binding protein (C/EBP), alpha                           | F: CCCAGCGGTGCCTTGTGC<br>R: TCCTTCCCCAGCCGTTAGTG                     |
|                                  | Dgat2            | ddiacylglycerol O-acyltransferase 2                                     | F: TTCCTGGCATAAGGCCCTATT<br>R: AGTCTATGGTGCTCTCGGTTGAC               |
|                                  | Crebbp (Cbp)     | CREB binding protein                                                    | F: GGCTTCTCCGCAATGACAA<br>R: GTTTGGACGCAGCATCTGGA                    |
| Relation of Bile Acid Metabolism | Hmgcr            | 3-hydroxy-3-methylglutaryl-co-enzyme A reductase                        | F: CTGGAATTATGAGTGCCCCAAA<br>R: ACTCTATGGTGTTCTCGGTTGAC              |
|                                  | Ldlr             | low density lipoprotein receptor                                        | Taqman : Mm00440169_m1                                               |
|                                  | Cyp7a1           | cytochrome P450, family 7, subfamily a, polypeptide 1                   | Taqman : Mm00484152_m1                                               |
| Others                           | Fabp1            | fatty acid binding protein 1                                            | F: ATGAACTTCTCCGGCAAGTACC<br>R: CTGACACCCCCTTGATGTCC                 |
|                                  | Elovl6           | ELOVL family member 6, elongation of long chain fatty acids             | F: GAAAAGCAGTTCAACGAGAACG<br>R: AGATGCCGACCACCAAAGATA                |
|                                  | Fasn             | fatty acid synthase                                                     | F: GGAGGTGGTGATAGCCGGTAT<br>R: TGGGTAATCCATAGAGCCCAG                 |
|                                  | Gpam (Gpat1)     | glycerol-3-phosphate acyltransferase, mitochondrial                     | F: ACAGTTGGCACAAATAGACGTTT<br>R: CCTTCCATTTCAGTGTGCAGA               |
|                                  |                  |                                                                         |                                                                      |

Table S3: Complete GO enrichment analysis results.

S3a. List of GO terms more enriched in the db-HC compared to the db-HF group.

| Pathway Description                                                                      | Pvalue     | Ontology |
|------------------------------------------------------------------------------------------|------------|----------|
| monocarboxylic acid metabolic process                                                    | 1.92E-14   | BP       |
| lipid biosynthetic process                                                               | 2.09E-12   | BP       |
| small molecule biosynthetic process                                                      | 3.57E-11   | BP       |
| acyl-CoA metabolic process                                                               | 3.24E-10   | BP       |
| thioester metabolic process                                                              | 3.24E-10   | BP       |
| nucleoside bisphosphate metabolic process                                                | 7.66E-09   | BP       |
| ribonucleoside bisphosphate metabolic process                                            | 7.66E-09   | BP       |
| purine nucleoside bisphosphate metabolic process                                         | 7.66E-09   | BP       |
| double-strand break repair via break-induced replication                                 | 1.36E-08   | BP       |
| response to fatty acid                                                                   | 2.91E-08   | BP       |
| xenobiotic metabolic process                                                             | 5.21E-08   | BP       |
| ribose phosphate metabolic process                                                       | 2.74E-07   | BP       |
| fatty acid derivative metabolic process                                                  | 1.15E-06   | BP       |
| organic hydroxy compound metabolic process                                               | 1.43E-06   | BP       |
| response to xenobiotic stimulus                                                          | 2.82E-06   | BP       |
| DNA-dependent DNA replication                                                            | 4.37E-06   | BP       |
| anion transport                                                                          | 5.62E-06   | BP       |
| response to lipoprotein particle                                                         | 7.12E-06   | BP       |
| response to acid chemical                                                                | 1.16E-05   | BP       |
| glutathione metabolic process                                                            | 1.26E-05   | BP       |
| cellular response to lipoprotein particle stimulus                                       | 1.32E-05   | BP       |
| lipid catabolic process                                                                  | 2.28E-05   | BP       |
| response to bacterium                                                                    | 3.32E-05   | BP       |
| regulation of G2/M transition of mitotic cell cycle                                      | 8.46E-05   | BP       |
| drug transport                                                                           | 0.00010609 | BP       |
| macrophage cytokine production                                                           | 0.00013514 | BP       |
| organic hydroxy compound biosynthetic process                                            | 0.00018484 | BP       |
| cellular hormone metabolic process                                                       | 0.00019559 | BP       |
| myeloid leukocyte migration                                                              | 0.00020903 | BP       |
| susceptibility to natural killer cell mediated cytotoxicity                              | 0.00022562 | BP       |
| T cell mediated cytotoxicity                                                             | 0.0002382  | BP       |
| response to stilbenoid                                                                   | 0.00025072 | BP       |
| positive regulation of myeloid leukocyte cytokine production involved in immune response | 0.00025072 | BP       |
| cellular response to fatty acid                                                          | 0.00028062 | BP       |
| cell cycle G2/M phase transition                                                         | 0.00037903 | BP       |
| small molecule catabolic process                                                         | 0.00051536 | BP       |
| regulation of protein kinase B signaling                                                 | 0.00052314 | BP       |
| vitamin metabolic process                                                                | 0.00052858 | BP       |
| carbohydrate metabolic process                                                           | 0.00054329 | BP       |
| natural killer cell activation                                                           | 0.0006727  | BP       |

|                                                                                                       |            |    |
|-------------------------------------------------------------------------------------------------------|------------|----|
| lipid localization                                                                                    | 0.00077759 | BP |
| import into cell                                                                                      | 0.00087457 | BP |
| DNA replication checkpoint                                                                            | 0.00096611 | BP |
| lipoprotein transport                                                                                 | 0.00096611 | BP |
| lipoprotein localization                                                                              | 0.00096611 | BP |
| inorganic ion homeostasis                                                                             | 0.0012638  | BP |
| carboxylic acid transmembrane transport                                                               | 0.0012964  | BP |
| carbohydrate derivative catabolic process                                                             | 0.00154089 | BP |
| estrogen metabolic process                                                                            | 0.00166521 | BP |
| cellular response to exogenous dsRNA                                                                  | 0.00166521 | BP |
| inflammatory response                                                                                 | 0.00169386 | BP |
| amino sugar metabolic process                                                                         | 0.00184071 | BP |
| production of molecular mediator of immune response                                                   | 0.00196987 | BP |
| positive regulation of ion transport                                                                  | 0.00211868 | BP |
| positive regulation of leukocyte mediated cytotoxicity                                                | 0.00233388 | BP |
| cellular response to acid chemical                                                                    | 0.00238944 | BP |
| response to nutrient                                                                                  | 0.00255313 | BP |
| retinoic acid metabolic process                                                                       | 0.00265445 | BP |
| defense response to virus                                                                             | 0.00291317 | BP |
| syncytium formation                                                                                   | 0.00296828 | BP |
| positive regulation of lymphocyte mediated immunity                                                   | 0.00298344 | BP |
| cellular ion homeostasis                                                                              | 0.00314909 | BP |
| mitotic DNA integrity checkpoint                                                                      | 0.00317276 | BP |
| modified amino acid transport                                                                         | 0.00327406 | BP |
| response to toxic substance                                                                           | 0.00354628 | BP |
| response to reactive oxygen species                                                                   | 0.0036159  | BP |
| flavonoid metabolic process                                                                           | 0.0038016  | BP |
| positive regulation of response to external stimulus                                                  | 0.00389088 | BP |
| nitric oxide biosynthetic process                                                                     | 0.0046277  | BP |
| lipid storage                                                                                         | 0.0046277  | BP |
| positive regulation of cell killing                                                                   | 0.0046277  | BP |
| regulation of reactive oxygen species metabolic process                                               | 0.00466581 | BP |
| response to interferon-alpha                                                                          | 0.00479411 | BP |
| modification of postsynaptic structure                                                                | 0.00479411 | BP |
| antigen processing and presentation                                                                   | 0.00496743 | BP |
| oxidoreductase activity, acting on paired donors, with incorporation or reduction of molecular oxygen | 1.55E-08   | MF |
| oxidoreductase activity, acting on CH-OH group of donors                                              | 7.74E-08   | MF |
| iron ion binding                                                                                      | 1.68E-07   | MF |
| cofactor binding                                                                                      | 5.36E-07   | MF |
| monocarboxylic acid binding                                                                           | 2.12E-06   | MF |
| CoA-ligase activity                                                                                   | 1.86E-05   | MF |
| single-stranded DNA helicase activity                                                                 | 2.64E-05   | MF |
| organic acid binding                                                                                  | 3.27E-05   | MF |
| tetrapyrrole binding                                                                                  | 3.81E-05   | MF |

|                                                                                       |            |    |
|---------------------------------------------------------------------------------------|------------|----|
| DNA replication origin binding                                                        | 6.66E-05   | MF |
| transferase activity, transferring alkyl or aryl (other than methyl) groups           | 8.27E-05   | MF |
| solute:sodium symporter activity                                                      | 9.39E-05   | MF |
| steroid dehydrogenase activity                                                        | 0.00011482 | MF |
| natural killer cell lectin-like receptor binding                                      | 0.00034764 | MF |
| intramolecular oxidoreductase activity, transposing C=C bonds                         | 0.00050764 | MF |
| active ion transmembrane transporter activity                                         | 0.00050887 | MF |
| sulfur compound binding                                                               | 0.00059006 | MF |
| symporter activity                                                                    | 0.00066941 | MF |
| active transmembrane transporter activity                                             | 0.00068186 | MF |
| DNA helicase activity                                                                 | 0.00076502 | MF |
| modified amino acid binding                                                           | 0.00081752 | MF |
| oxidoreductase activity, acting on the CH-CH group of donors, NAD or NADP as acceptor | 0.00106185 | MF |
| glutathione binding                                                                   | 0.00129171 | MF |
| oligopeptide binding                                                                  | 0.00129171 | MF |
| DNA-dependent ATPase activity                                                         | 0.00144348 | MF |
| amide binding                                                                         | 0.00149045 | MF |
| NADP binding                                                                          | 0.00265188 | MF |
| C-acyltransferase activity                                                            | 0.00267272 | MF |
| vitamin binding                                                                       | 0.00347003 | MF |
| steroid binding                                                                       | 0.00396085 | MF |
| carboxylic ester hydrolase activity                                                   | 0.00422604 | MF |
| beta-2-microglobulin binding                                                          | 0.00512492 | MF |
| TAP binding                                                                           | 0.00512492 | MF |
| glucose binding                                                                       | 0.00666402 | MF |
| inorganic molecular entity transmembrane transporter activity                         | 0.00758257 | MF |
| oxidoreductase activity, acting on peroxide as acceptor                               | 0.00760896 | MF |
| T cell receptor binding                                                               | 0.01048801 | MF |
| cargo receptor activity                                                               | 0.01203175 | MF |
| MCM complex                                                                           | 5.13E-07   | CC |
| anchored component of membrane                                                        | 1.79E-05   | CC |
| lipid droplet                                                                         | 1.98E-05   | CC |
| brush border                                                                          | 2.24E-05   | CC |
| brush border membrane                                                                 | 5.37E-05   | CC |
| external side of plasma membrane                                                      | 5.58E-05   | CC |
| anchored component of plasma membrane                                                 | 0.00030201 | CC |
| MHC class I protein complex                                                           | 0.00032605 | CC |
| peroxisome                                                                            | 0.00034763 | CC |
| microbody                                                                             | 0.00034763 | CC |
| apical part of cell                                                                   | 0.00063442 | CC |
| apical plasma membrane                                                                | 0.0020591  | CC |
| Golgi cisterna                                                                        | 0.00292146 | CC |

S3b. GO terms more enriched in the db-HF compared to the db-HC group.

| Pathway Description                                            | Pvalue     | Ontology |
|----------------------------------------------------------------|------------|----------|
| alpha-amino acid metabolic process                             | 1.32E-13   | BP       |
| small molecule catabolic process                               | 6.02E-09   | BP       |
| drug catabolic process                                         | 1.23E-08   | BP       |
| acute-phase response                                           | 4.52E-07   | BP       |
| negative regulation of peptidase activity                      | 6.02E-07   | BP       |
| small molecule biosynthetic process                            | 2.69E-06   | BP       |
| complement activation, alternative pathway                     | 3.59E-06   | BP       |
| xenobiotic metabolic process                                   | 1.39E-05   | BP       |
| regulation of tube diameter                                    | 1.97E-05   | BP       |
| regulation of blood vessel diameter                            | 1.97E-05   | BP       |
| lipid catabolic process                                        | 3.08E-05   | BP       |
| fatty acid derivative metabolic process                        | 3.41E-05   | BP       |
| regulation of actomyosin structure organization                | 3.91E-05   | BP       |
| hormone metabolic process                                      | 4.15E-05   | BP       |
| response to xenobiotic stimulus                                | 5.75E-05   | BP       |
| cytolysis                                                      | 5.78E-05   | BP       |
| liver development                                              | 6.41E-05   | BP       |
| urea cycle                                                     | 6.74E-05   | BP       |
| fibrinolysis                                                   | 7.68E-05   | BP       |
| negative regulation of hydrolase activity                      | 0.00011581 | BP       |
| positive regulation of stress fiber assembly                   | 0.00012055 | BP       |
| plasminogen activation                                         | 0.00012911 | BP       |
| vascular process in circulatory system                         | 0.00014334 | BP       |
| nitrogen cycle metabolic process                               | 0.00015283 | BP       |
| regulation of peptidase activity                               | 0.00024898 | BP       |
| response to glucocorticoid                                     | 0.00037827 | BP       |
| negative regulation of multi-organism process                  | 0.00039749 | BP       |
| dicarboxylic acid transport                                    | 0.00052629 | BP       |
| negative regulation of hemostasis                              | 0.00068252 | BP       |
| cellular modified amino acid metabolic process                 | 0.00068438 | BP       |
| negative regulation of coagulation                             | 0.00077147 | BP       |
| bile acid biosynthetic process                                 | 0.00084055 | BP       |
| response to stilbenoid                                         | 0.00084055 | BP       |
| regulation of blood circulation                                | 0.00086536 | BP       |
| organic hydroxy compound metabolic process                     | 0.00107477 | BP       |
| sulfur compound catabolic process                              | 0.00128016 | BP       |
| regulation of body fluid levels                                | 0.00162951 | BP       |
| response to peptide hormone                                    | 0.00191938 | BP       |
| rhythmic process                                               | 0.00194724 | BP       |
| humoral immune response mediated by circulating immunoglobulin | 0.00200377 | BP       |
| neutral lipid biosynthetic process                             | 0.00200377 | BP       |
| acylglycerol biosynthetic process                              | 0.00200377 | BP       |
| negative regulation of reproductive process                    | 0.00200377 | BP       |
| thyroid hormone metabolic process                              | 0.00210828 | BP       |
| regulation of mucus secretion                                  | 0.00210828 | BP       |



|                                                                                                                               |            |    |
|-------------------------------------------------------------------------------------------------------------------------------|------------|----|
| polyol biosynthetic process                                                                                                   | 0.00223574 | BP |
| regulation of ERK1 and ERK2 cascade                                                                                           | 0.00271029 | BP |
| heart trabecula formation                                                                                                     | 0.0027601  | BP |
| response to alcohol                                                                                                           | 0.0032383  | BP |
| cofactor binding                                                                                                              | 7.53E-12   | MF |
| monooxygenase activity                                                                                                        | 4.16E-11   | MF |
| heme binding                                                                                                                  | 1.56E-10   | MF |
| endopeptidase inhibitor activity                                                                                              | 2.30E-09   | MF |
| iron ion binding                                                                                                              | 6.35E-08   | MF |
| amino acid binding                                                                                                            | 2.02E-05   | MF |
| organic acid binding                                                                                                          | 4.83E-05   | MF |
| growth factor activity                                                                                                        | 0.00010126 | MF |
| receptor ligand activity                                                                                                      | 0.00015951 | MF |
| signaling receptor activator activity                                                                                         | 0.0002006  | MF |
| vitamin binding                                                                                                               | 0.00033269 | MF |
| oxidoreductase activity, acting on the CH-NH group of donors                                                                  | 0.00038162 | MF |
| lyase activity                                                                                                                | 0.00043512 | MF |
| steroid dehydrogenase activity, acting on the CH-OH group of donors, NAD or NADP as acceptor                                  | 0.00045898 | MF |
| triglyceride lipase activity                                                                                                  | 0.00067293 | MF |
| pyridoxal phosphate binding                                                                                                   | 0.00078159 | MF |
| vitamin B6 binding                                                                                                            | 0.00088047 | MF |
| oxidoreductase activity, acting on CH or CH2 groups                                                                           | 0.00105403 | MF |
| steroid dehydrogenase activity                                                                                                | 0.00137365 | MF |
| extracellular matrix structural constituent                                                                                   | 0.00139792 | MF |
| heparin binding                                                                                                               | 0.00169367 | MF |
| transforming growth factor beta receptor binding                                                                              | 0.00178769 | MF |
| signaling receptor activity                                                                                                   | 0.0018659  | MF |
| molecular transducer activity                                                                                                 | 0.0018659  | MF |
| sulfur compound binding                                                                                                       | 0.00235597 | MF |
| growth factor binding                                                                                                         | 0.0030583  | MF |
| FAD binding                                                                                                                   | 0.00678184 | MF |
| protease binding                                                                                                              | 0.00801349 | MF |
| glycosaminoglycan binding                                                                                                     | 0.00865039 | MF |
| oxidoreductase activity, acting on single donors with incorporation of molecular oxygen, incorporation of two atoms of oxygen | 0.00924161 | MF |
| integrin binding                                                                                                              | 0.01011594 | MF |
| transmembrane receptor protein kinase activity                                                                                | 0.01046474 | MF |
| extracellular matrix                                                                                                          | 9.95E-05   | CC |
| collagen-containing extracellular matrix                                                                                      | 0.00010325 | CC |
